# Supplementary material for: Advancement in Microbial Fuel Cells Technology by Using Waste Extract as an Organic Substrate to Produce Energy with Metal Removal
Source: MDPI journal article supplement (doi:10.3390/pr11082434), 2023-08-12
Supplement: s1 [file s1]

## Supporting File

### **Advancement in Microbial Fuel Cells Technology by using Waste Extract as an Organic Substrate to Produce Energy with Metal Removal**

Ghada Mohamed Aleid<sup>1</sup>, Anoud Saud Alshammari<sup>2†</sup>, Alamri Rahmah Dhahawi Ahmad<sup>3†</sup>, Fida Hussain<sup>4</sup>, Sang-Eun Oh<sup>5</sup>, Akil Ahmad<sup>6</sup>, Mohamad Nasir Mohamad Ibrahim<sup>7</sup>, Khalid Umar<sup>7\*</sup>

<sup>1</sup>B.Sc. Department, Preparatory Year College, University of Ha'il, Hail, 55475, Saudi Arabia

<sup>2</sup>Department of physics and chemistry, Northern Border University, Rafha, 76313, Saudi Arabia

<sup>3</sup>Al-Mahwah Education Directorate, Ministry of Education, 65441, Saudi Arabia.

<sup>4</sup>Research Institute for Advanced Industrial Technology, College of Science and Technology, Korea Uni-versity, Sejong 30019, Republic of Korea

<sup>5</sup>Department of Biological Environment, Kangwon National University, Chuncheon-si, 24341, South Korea

<sup>6</sup>Department of Chemistry, College of Science and Humanities in Al-Kharj, Prince Sattam bin Abdulaziz University, Al-Kharj 11942, Saudi Arabia

<sup>7</sup>School of Chemical Sciences, Universiti Sains Malaysia, Penang, 11800, Malaysia

\*Correspondence: khalidumar@usm.my

†These authors contributed equally to this work.

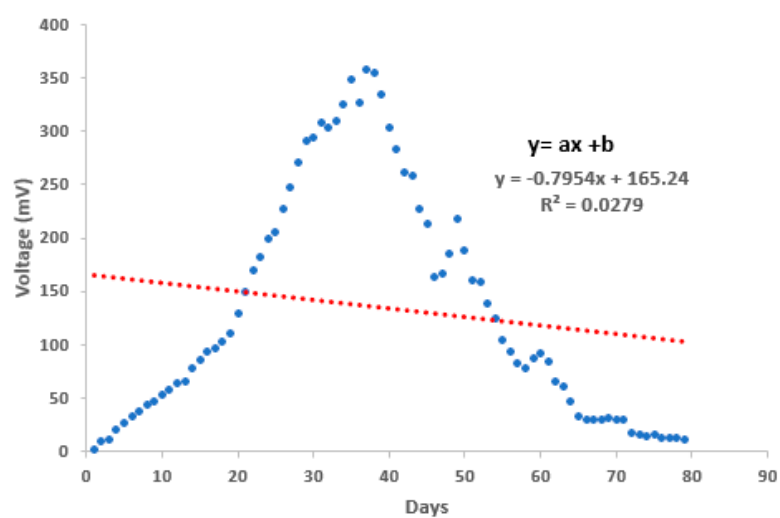

Figure S1. Regression analysis of voltage trend.

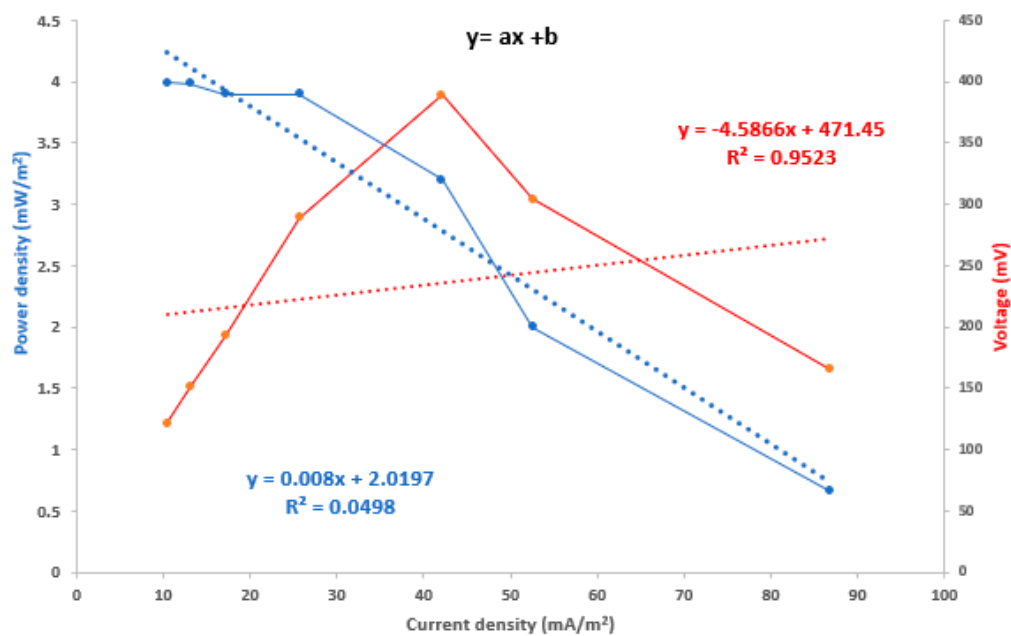

Figure S2. Regression analysis of polarization curves.

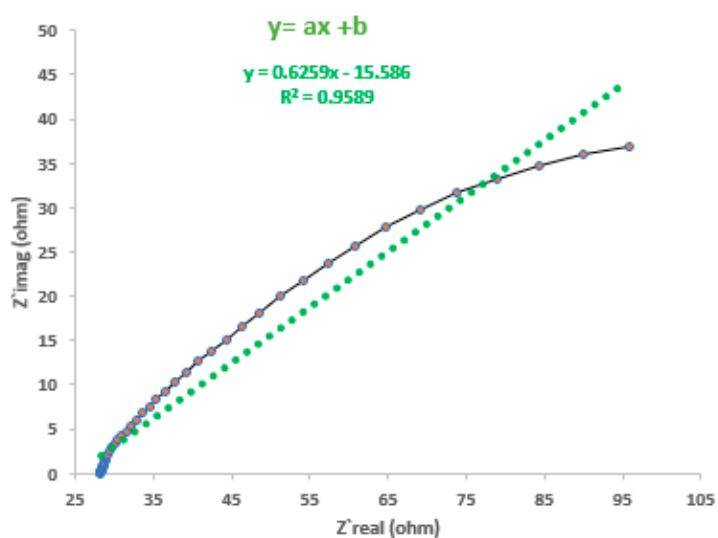

Figure S3. Regression analysis of EIS curves.

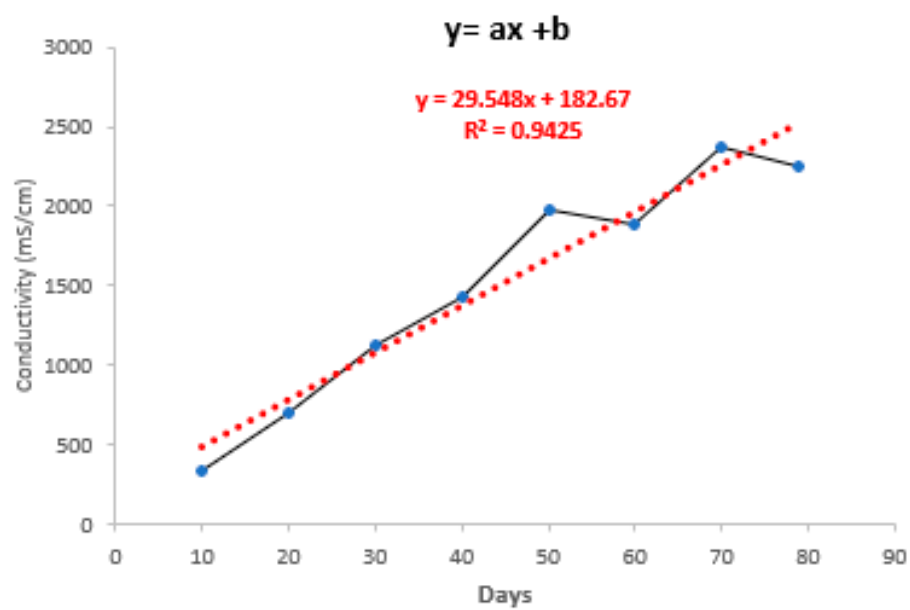

Figure S4. Regression analysis of conductivity trend.
